# Supplementary material
Source: publisher figshare collection journal article supplement (https://tandf.figshare.com/articles/dataset/_/1588798)
Supplement: Supplementary file 2 [file 2]

JOURNAL OF VERTEBRATE PALEONTOLOGY

Distinctive emydopoid dicynodont (Therapsida, Anomodontia) mandibles from the Permian Ruhuhu  
and Usili formations (Songea Group), Ruhuhu Basin, Tanzania

KENNETH D. ANGIELCZYK<sup>\*,1</sup> and C.. BARRY COX<sup>2</sup>; <sup>1</sup>Integrative Research Center, Field Museum  
of Natural History, 1400 South Lake Shore Drive, Chicago, Illinois, 60605, USA,  
kangielczyk@fieldmuseum.org; <sup>2</sup>Forge Cottage, 11 Blacksmith Close, Ashted KT21 2BD, United  
Kingdom, barrycox1931@gmail.com

<sup>\*</sup>Corresponding Author.

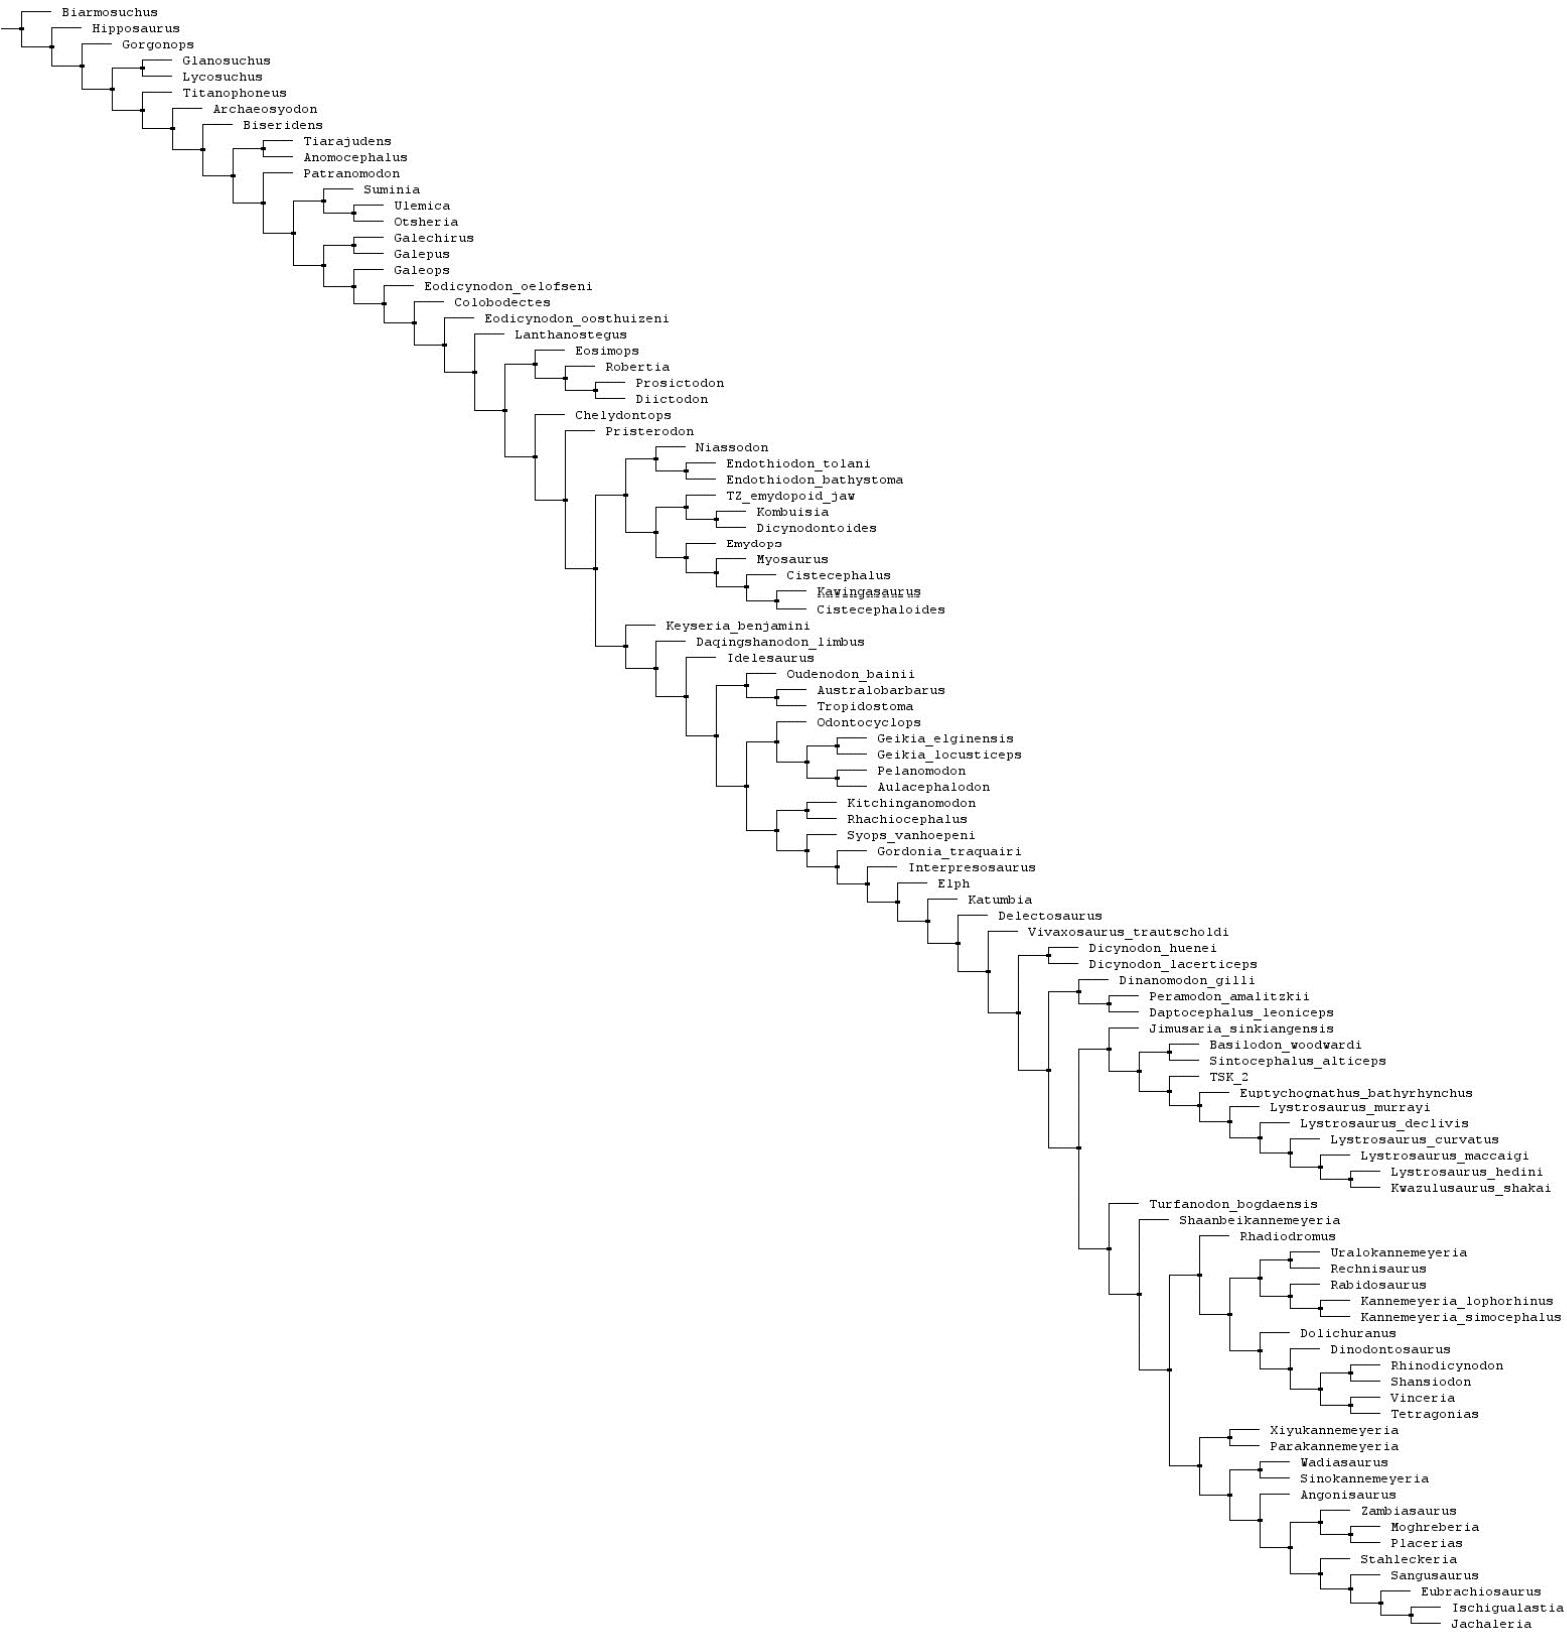

FIGURE S1. Complete cladogram from the phylogenetic analysis. Scores: 1011.816 steps, consistency
